# Supplementary material for: Study on the Fracture Toughness of Softwood and Hardwood Estimated by Boundary Effect Model
Source: MDPI journal article supplement (doi:10.3390/ma15114039), 2022-06-06
Supplement: s1 [file s1]

## Supporting material

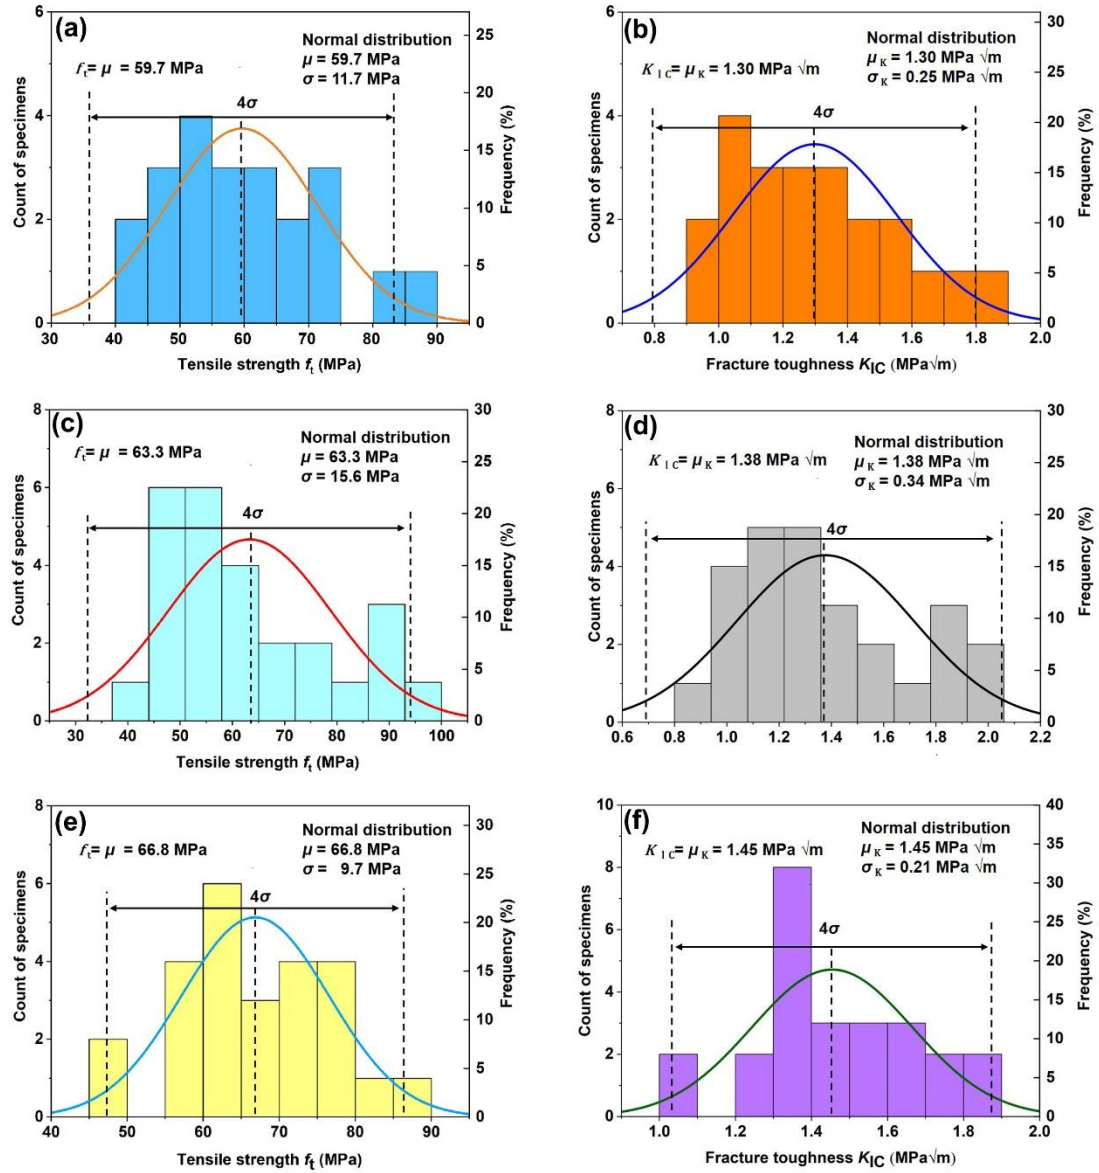

Figure S1. Normal distribution of tensile strength and fracture toughness of *Pinus sylvestris* var. *mongolica* Litv. with the ratio of latewood zone with less than 17% (a), 17~22% (c) and more than 22% (g) growth rings based on BEM solution.
